# Supplementary material
Source: publisher figshare collection journal article supplement (https://gsapubs.figshare.com/ndownloader/files/22461689)

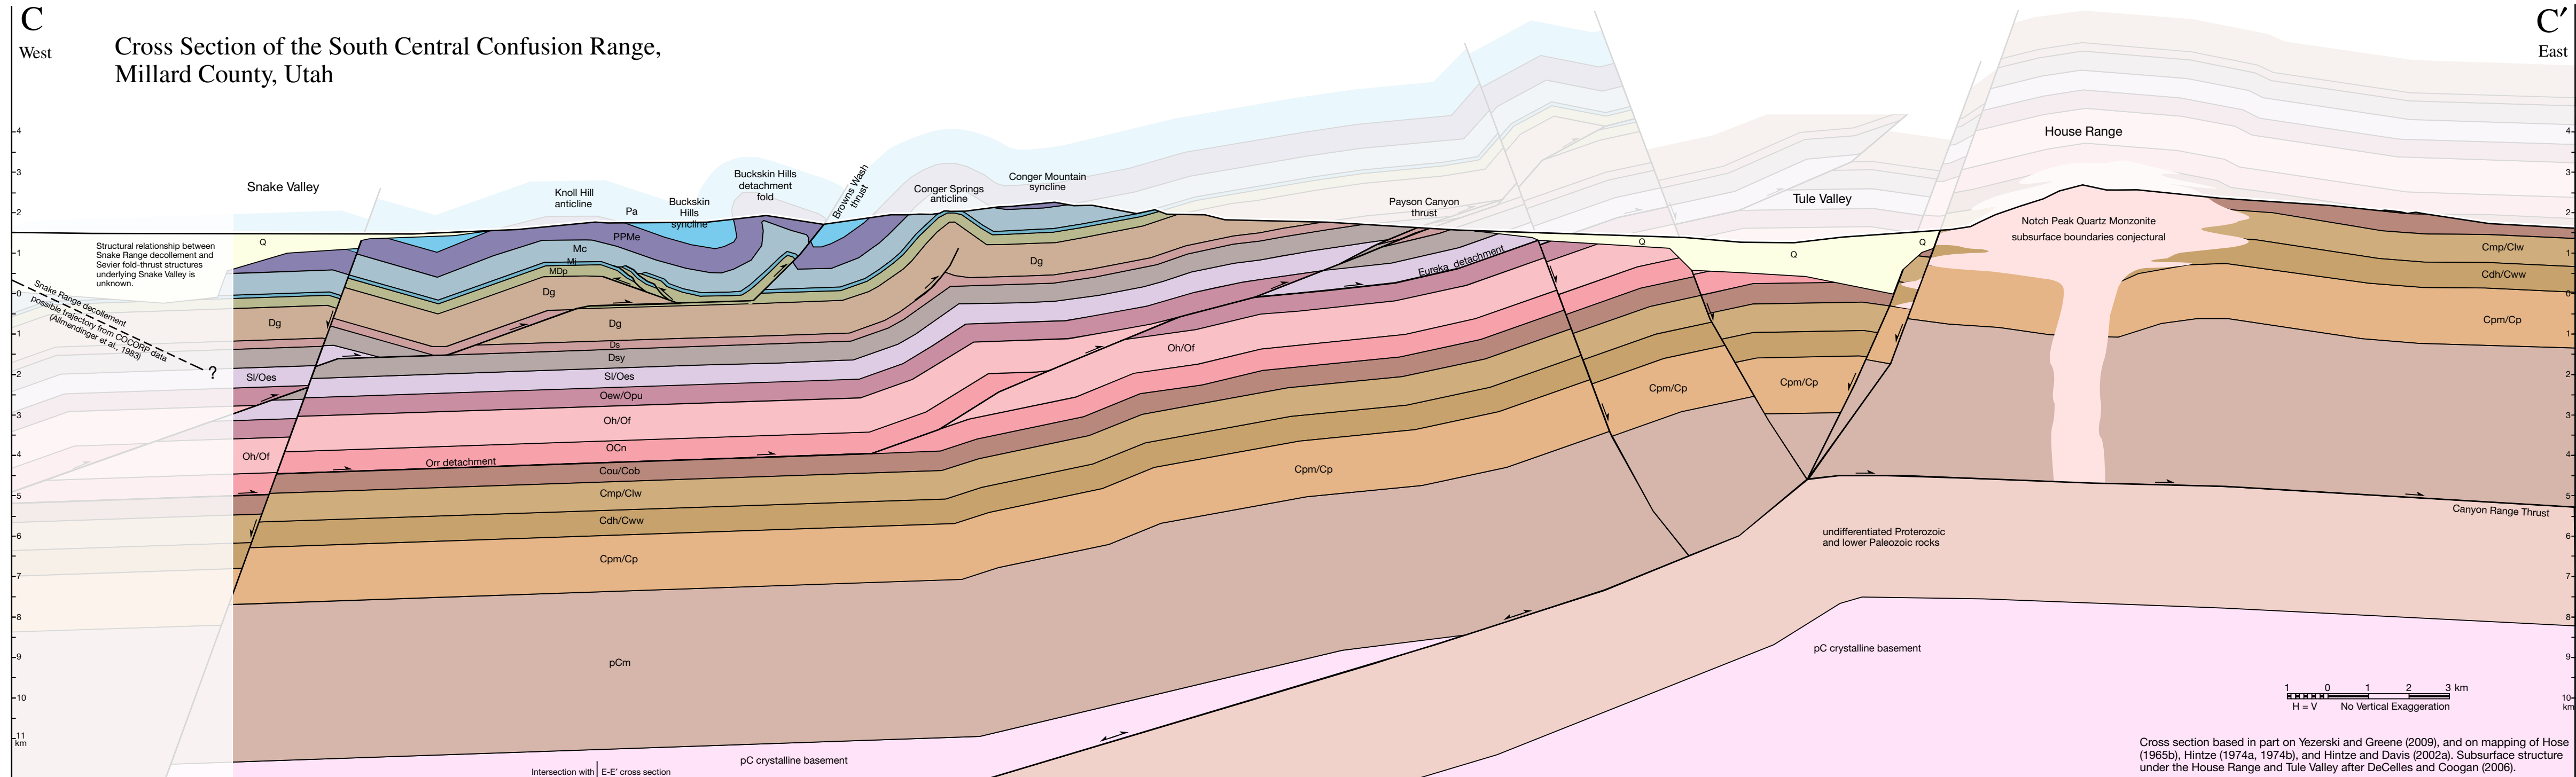

Supplement: Supplementary file 1 [file 22461689]
